# Supplementary material for: Zinc-Chelating Compounds as Inhibitors of Human and Bacterial Zinc Metalloproteases
Source: MDPI journal article supplement (doi:10.3390/molecules27010056), 2021-12-22
Supplement: s1 [file s1]

Supplementary Material

## **Zinc-chelating compounds as inhibitors of human and bacterial zinc metalloproteases**

Fatema Rahman<sup>1</sup>, Imin Wushur<sup>1</sup>, Nabin Malla<sup>1</sup>, Ove Alexander Høgmoen Åstrand<sup>2</sup>, Pål Rongved<sup>2</sup>, Jan-Olof Winberg<sup>1</sup> and Ingebrigt Sylte<sup>1,\*</sup>

<sup>1</sup>Molecular Pharmacology and Toxicology, Department of Medical Biology, faculty of Health Sciences, UiT — The Arctic University of Norway, NO-9037 Tromsø, Norway; fatema.rahman@uit.no (FR); [imin.wushur@uit.no](mailto:imin.wushur@uit.no) (IW); nabin.malla@uit.no (NM); ingebrigt.sylte@uit.no (IS); jan.o.winberg@uit.no (JOW).

<sup>2</sup>Department of Pharmaceutical Chemistry, School of Pharmacy, University of Oslo, PO Box 9 1068 Blindern, N-0316 Oslo, Norway; [alexander.aastrand@gmail.com](mailto:alexander.aastrand@gmail.com) (OAHÅ); [pal.rongved@farmasi.uio.no](mailto:pal.rongved@farmasi.uio.no) (PR).

Correspondence: ingebrigt.sylte@uit.no; Tel.: +47-77644705

Supplementary figure S1

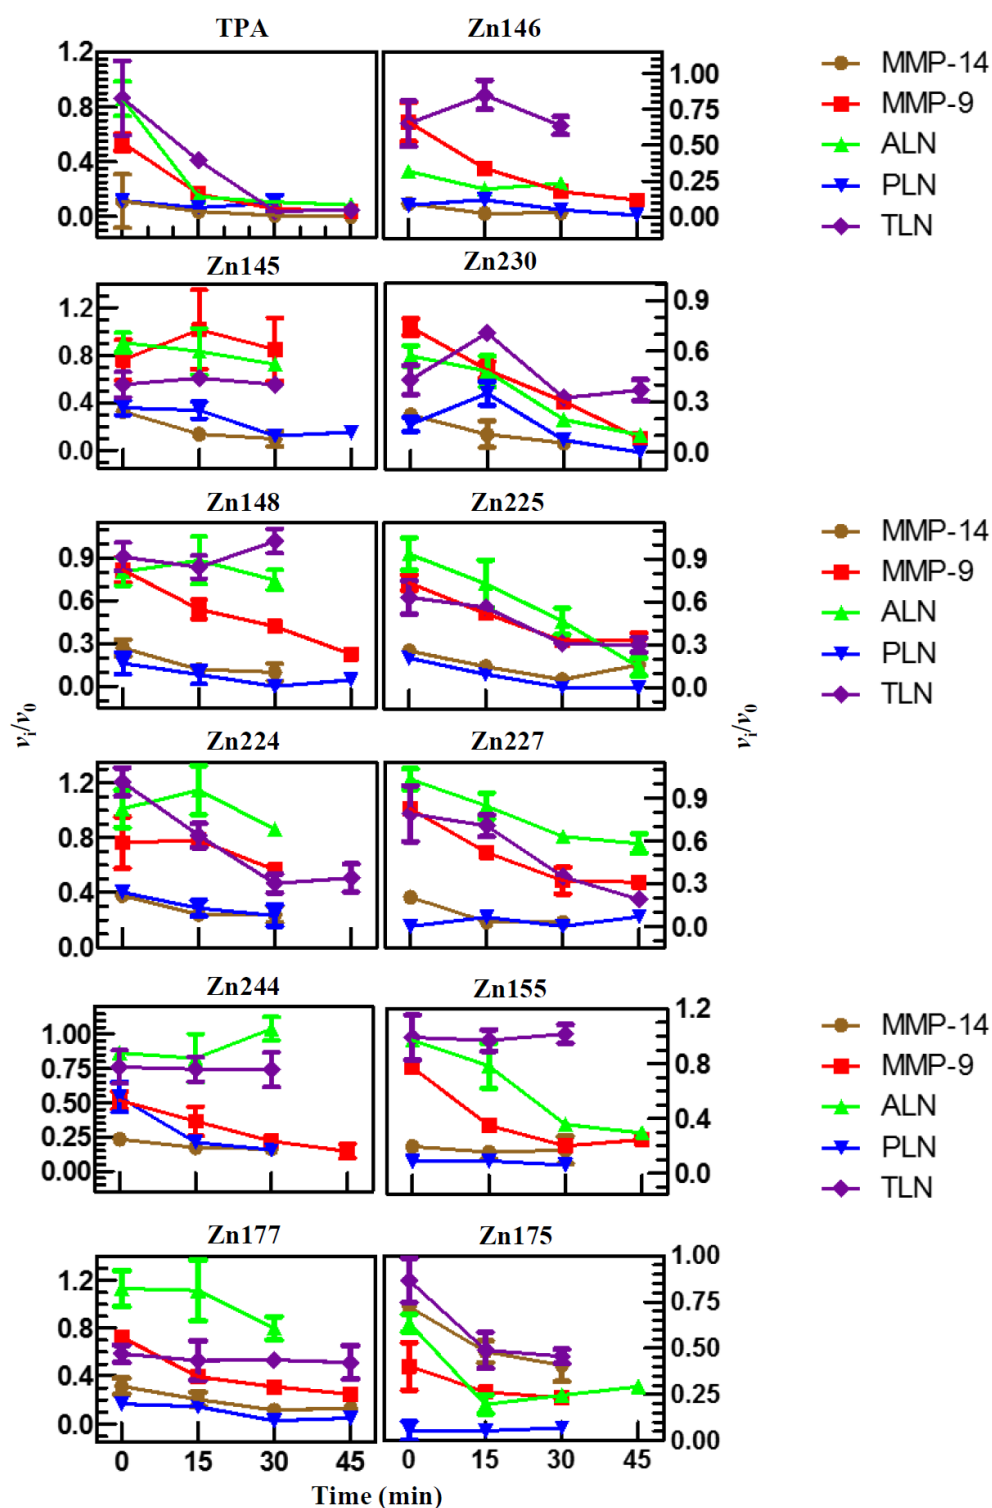

**Figure S1.** Time dependent inhibitory effects of 100  $\mu\text{M}$  TPA derivatives on the activity of MMP-9, MMP-14, TLN, PLN and ALN. The inhibition experiments were performed as described in Materials and Methods using a concentration of 4  $\mu\text{M}$  of the MMP-9 and MMP-14 substrate McaPLGL(Dpa)AR-NH<sub>2</sub> and the ALN, PLN and TLN substrate McaRPPGFSAFK(Dnp)-OH, except for ALN, where 5  $\mu\text{M}$  was used. The  $v_i/v_0$  (mean  $\pm$  s.d.) were based on 3-6 experiments.

Supplementary figure S2

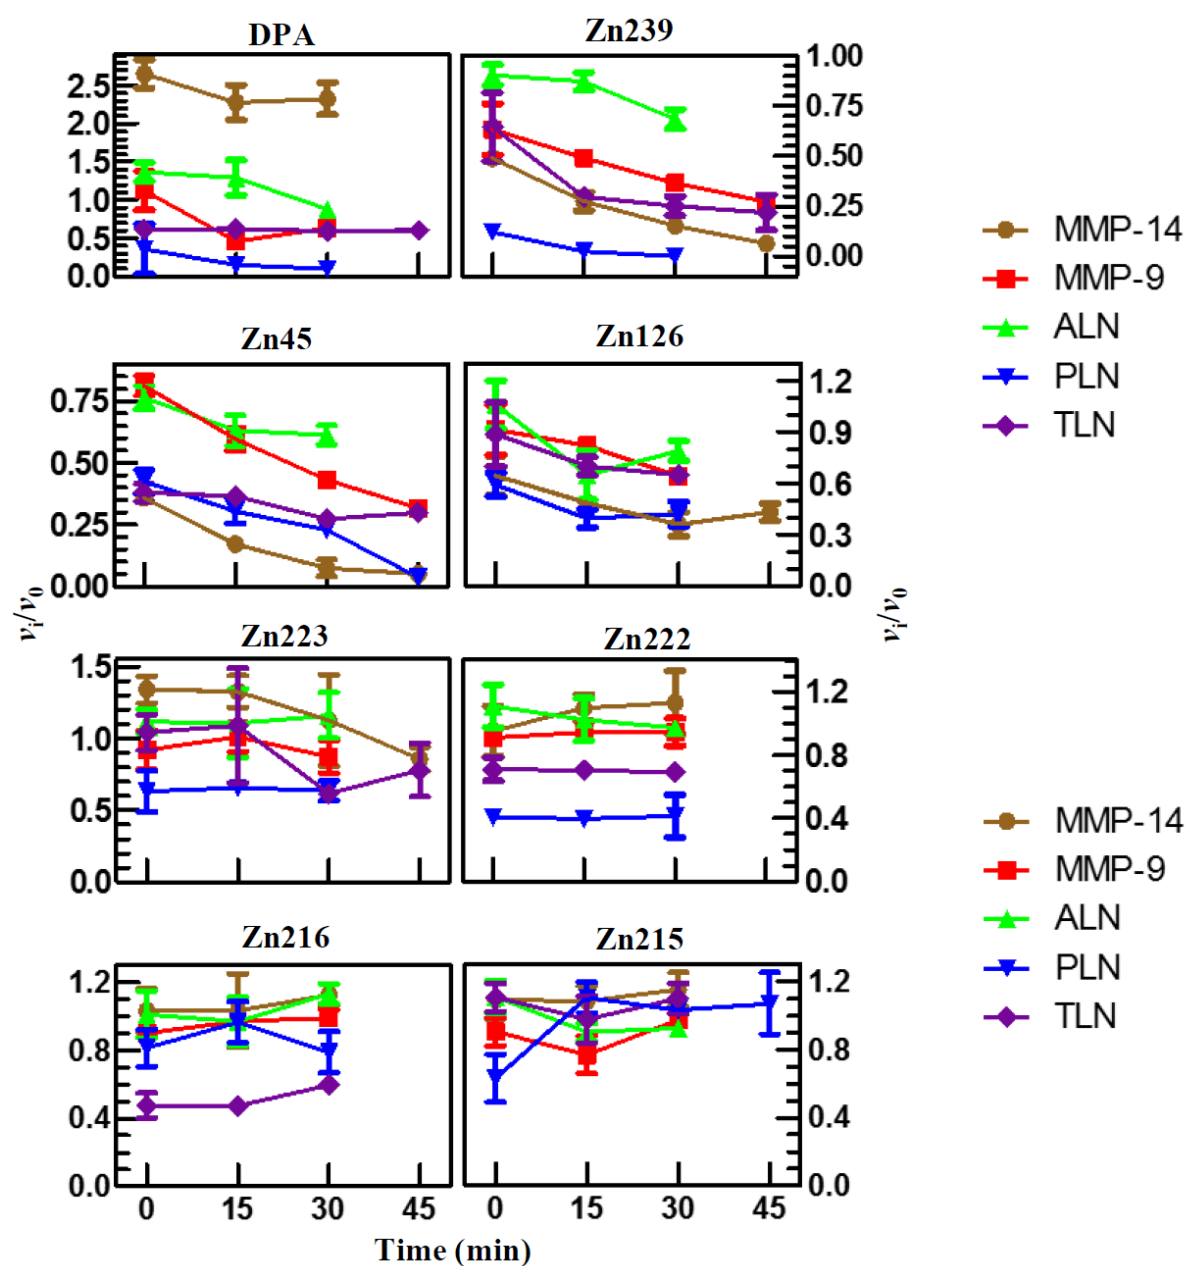

**Figure S2.** Time dependent inhibitory effects of 100  $\mu$ M DPA, TPEN, pyridine and thiophene derivatives on the activity of MMP-9, MMP-14, TLN, PLN and ALN. The inhibition experiments were performed as described in Materials and Methods using a fixed concentration of 4  $\mu$ M of the MMP-9 and MMP-14 substrate McaPLGL(Dpa)AR-NH<sub>2</sub> and the ALN, PLN and TLN substrate McaRPPGFSAFK(Dnp)-OH. For ALN 5  $\mu$ M was used. The  $v_i/v_0$  (mean  $\pm$  s.d.) were based on 3-6 experiments.
